# Supplementary material for: Design and regulation of high-performance photovoltaic systems based on novel two-dimensional KAgSe/KAgX (X = S, Te) van der Waals heterojunctions
Source: Royal Society of Chemistry journal article supplement (doi:10.1039/d3ta04584f), 2023-01-01
Supplement: d3ta04584f1.pdf [file d3ta04584f1.pdf]

## Supplemental Information

### **Design and regulation of high-performance photovoltaic systems based on two-dimensional novel KAgSe/KAgX (X = S, Te) van der Waals heterojunctions**

Keying Han,<sup>a</sup> Qiang Wang,<sup>\*,a</sup> Yan Liang,<sup>\*,b</sup> Thomas Frauenheim,<sup>\*,c</sup> Defeng Guo,<sup>\*,a</sup>  
and Bin Wang<sup>\*,d</sup>

<sup>a</sup> State Key Laboratory of Metastable Materials Science and Technology and Key Laboratory for Microstructural Material Physics of Hebei Province, School of Science, Yanshan University, Qinhuangdao 066004, People's Republic of China. E-mail: qiangwang@ysu.edu.cn; guodf@ysu.edu.cn

<sup>b</sup> College of Physics and Optoelectronic Engineering, Faculty of Information Science and Engineering, Ocean University of China, Songling Road 238, Qingdao 266100, People's Republic of China. E-mail: yliang.phy@ouc.edu.cn

<sup>c</sup> School of Science, Constructor University, 28759 Bremen, Germany; Computational Science and Applied Research Institute (CSAR), Shenzhen 518110, P. R. China; Beijing Computational Science Research Center (CSRC), Beijing 100193, P. R. China. E-mail: thomas.frauenheim@bccms.uni-bremen.de

<sup>d</sup> Shenzhen Key Laboratory of Advanced Thin Films and Applications, College of Physics and Optoelectronic Engineering, Shenzhen University, Shenzhen, 518060, People's Republic of China. E-mail: binwang@szu.edu.cn

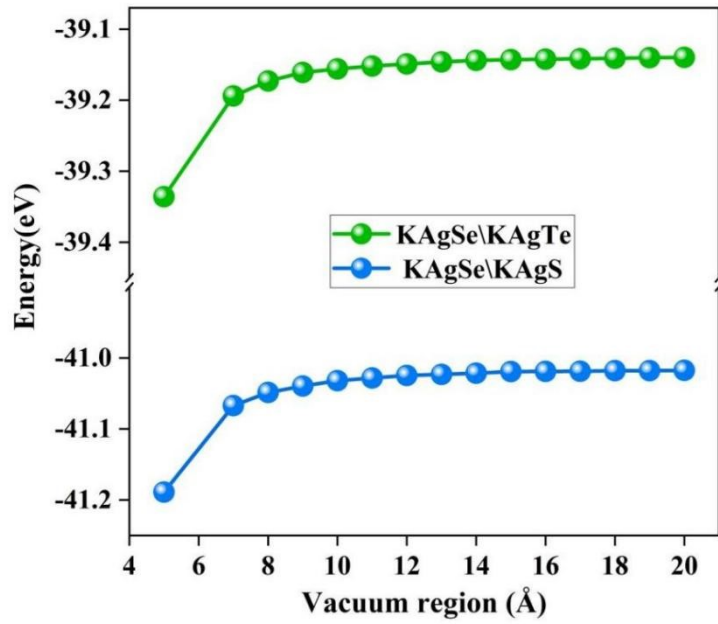

**Fig. S1** The total energy as a function of the vacuum region for KAgSe/KAgX (X = S, Te) vdWHs.

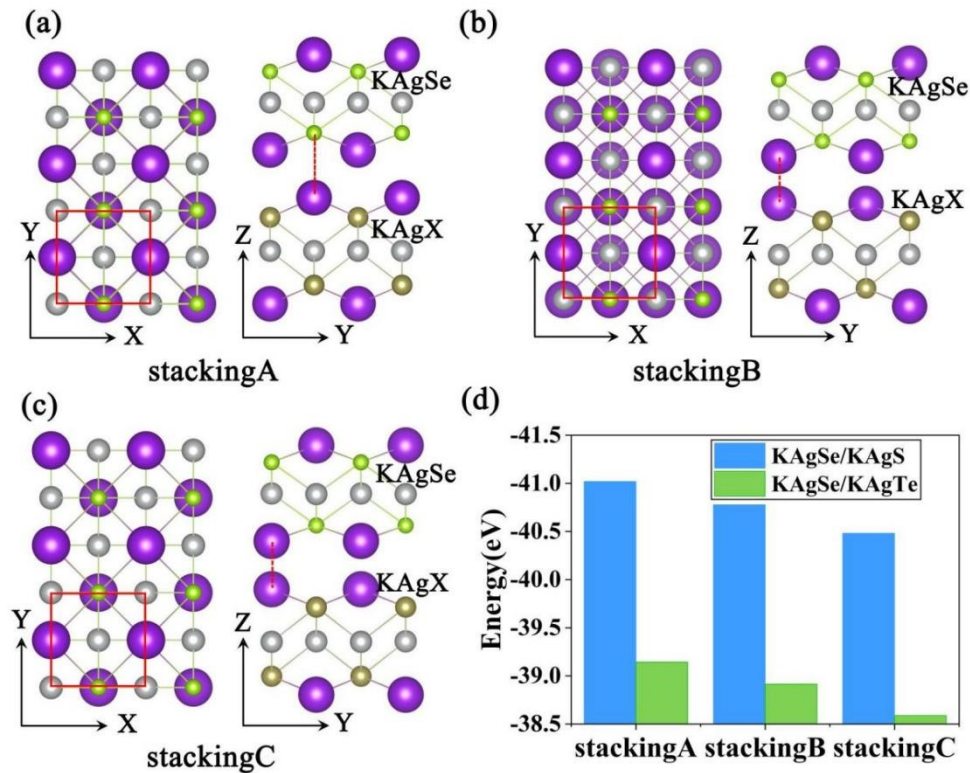

**Fig. S2** (a-c) Different stacking modes for the KAgSe/KAgX (X = S, Te) vdWHs. (d) Total energy under the different stacking modes for KAgSe/KAgX (X = S, Te) vdWHs.

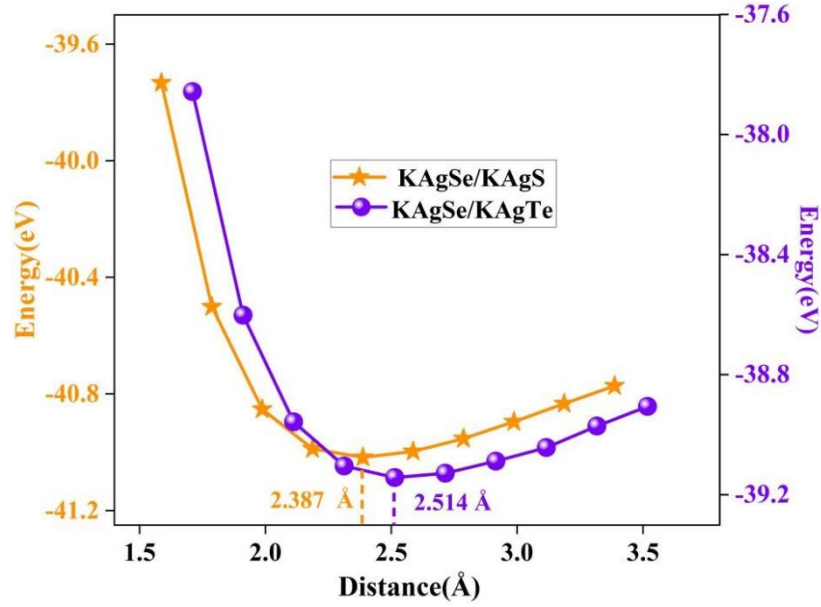

**Fig. S3** Variation in the total energies, with interlayer distance  $d$  (Å) in KAgSe/KAgX ( $X = S, Te$ ) vdWHs.

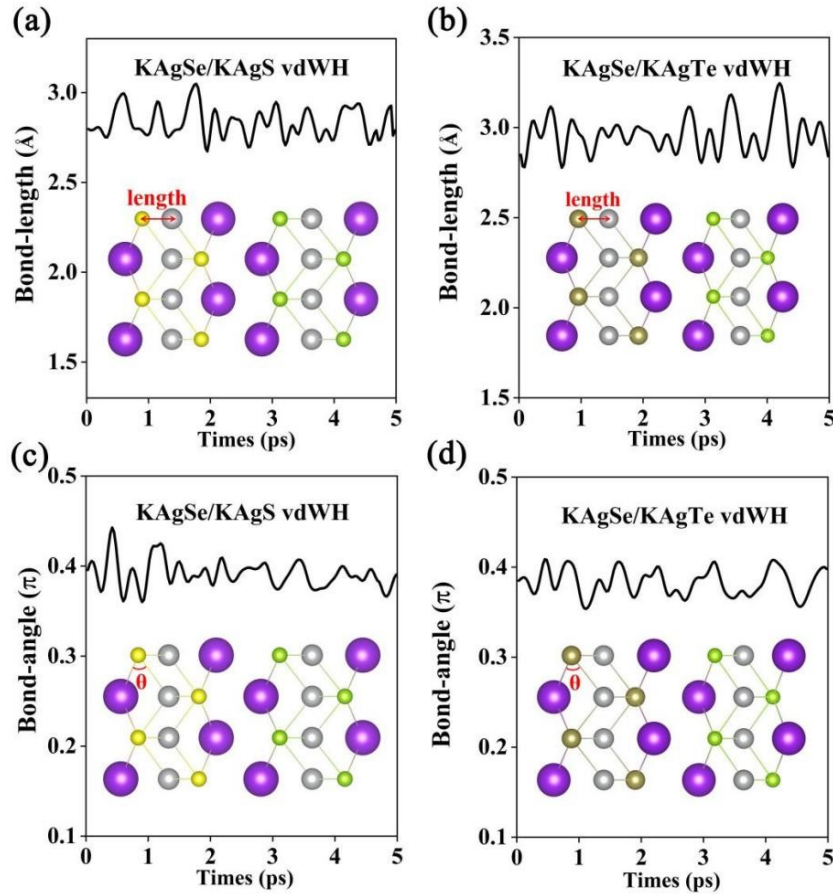

**Fig. S4** The bond lengths (a-b) and angles (c-d) during the evolution process for KAgSe/KAgX vdWHs at 300 K, respectively.

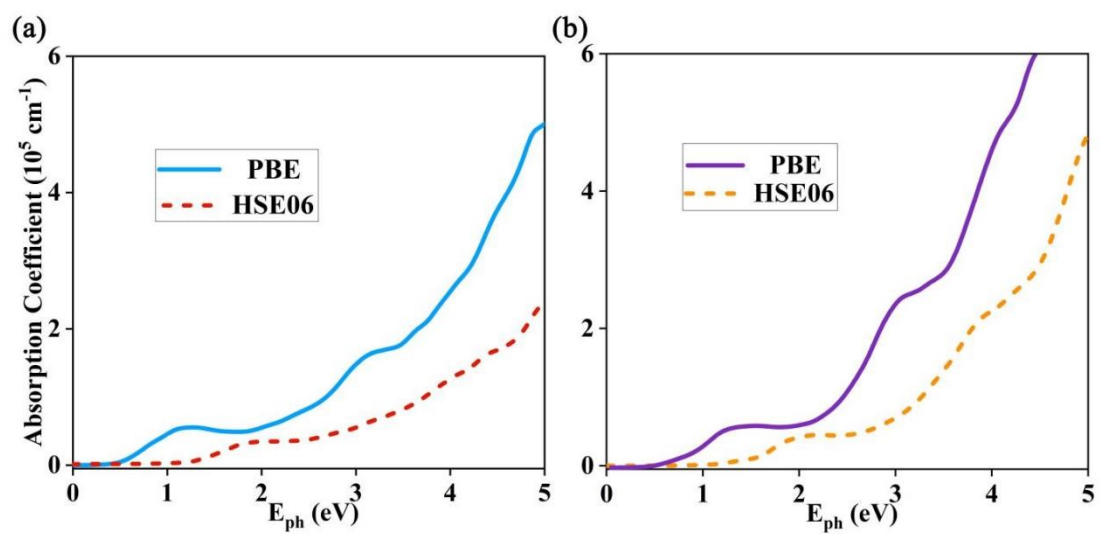

**Fig. S5** Optical absorption coefficients curve upon energy of the incident light under PBE and HSE06 levels for KAgSe/KAgS (a) and KAgSe/KAgTe (b) vdWHs, respectively.
